# Supplementary material for: Alcohol Withdrawal Severity Measures for Identifying Patients Requiring High-Intensity Care
Source: PubMed Central journal article supplement — Crit Care Explor. 2024 Mar 18;6(3):e1066. doi: 10.1097/CCE.0000000000001066 (PMC10950191; doi:10.1097/cce.0000000000001066), 2024-03-18
Supplement: cc9-6-e1066-s001.pdf [file cc9-6-e1066-s001.pdf]

## **SUPPLEMENTAL DOCUMENT**

### **Alcohol withdrawal severity measures for identifying patients requiring high-intensity care**

Daniel C. To MD<sup>1</sup>, Tessa L. Steel MD, MPH<sup>2</sup>, Kyle A. Carey MPH<sup>3</sup>, Cara J. Joyce PhD<sup>4</sup>, Elizabeth M. Salisbury-Afshar MD, MPH<sup>5</sup>, Dana P. Edelson MD<sup>3</sup>, Anoop Mayampurath PhD<sup>1,6</sup>, Matthew M. Churpek MD, MPH, PhD<sup>1,6</sup>, Majid Afshar MD, MSCR<sup>1,6</sup>

<sup>1</sup>Department of Medicine, University of Wisconsin-Madison

<sup>2</sup>Department of Medicine, University of Washington

<sup>3</sup>Department of Medicine, University of Chicago

<sup>4</sup>Department of Public Health Sciences, Loyola University Chicago

<sup>5</sup>Department of Family Medicine and Community Health, University of Wisconsin-Madison

<sup>6</sup>Department of Bioinformatics and Medical Informatics, University of Wisconsin-Madison

Corresponding Author: Daniel To, [dto@uwhealth.org](mailto:dto@uwhealth.org)

Conflicts of Interest and Source of Funding: Dr. Tessa Steel received funding from and the National Institute on Alcohol Abuse and Alcoholism (NIAAA) K23AA030588. Dr. Anoop Mayampurath received funding from the National Heart, Lung, and Blood Institute (NHLBI) K01HL148390. Dr. Matthew Churpek received funding from NHLBI R01HL157262. Dr. Majid Afshar received funding from the National Institute on Drug Abuse (NIDA) R01DA051464. For the remaining authors, none were declared.

Key words: Alcohol Use Disorder, Substance withdrawal syndrome, Intensive care units, Benzodiazepines, Inpatients

**Table of content**

|                                                                                                           |   |
|-----------------------------------------------------------------------------------------------------------|---|
| Appendix 1. Conversion of benzodiazepine and phenobarbital to Lorazepam milligram equivalent .....        | 3 |
| Appendix 2. Distribution of Lorazepam milligram equivalent.....                                           | 4 |
| Appendix 3. Learning curve of total Lorazepam milligram equivalent over 48 hours .....                    | 5 |
| Appendix 4. Cohort patient characteristics by center .....                                                | 6 |
| Appendix 5. Subgroup analysis of Clinical Institute Withdrawal Assessment (CIWA-Ar) score by center ..... | 7 |
| Appendix 6. Subgroup analysis of Lorazepam milligram equivalent by center .....                           | 8 |

---

| <b>Medication Name</b>  | <b>Lorazepam milligram equivalent (LME)</b> |
|-------------------------|---------------------------------------------|
| Lorazepam (IV/Oral)     | 1                                           |
| Diazepam (IV/Oral)      | 5                                           |
| Midazolam (IV)          | 2                                           |
| Chlordiazepoxide (Oral) | 12.5                                        |
| Oxazepam (Oral)         | 5                                           |
| Phenobarbital (IV/Oral) | 15                                          |

---

**Appendix 1.** Conversion of benzodiazepine and phenobarbital to Lorazepam milligram equivalent

---

**Percentile**

**Lorazepam Milligram Equivalent (LME)**

|      | University of Chicago | University of Wisconsin Madison |
|------|-----------------------|---------------------------------|
| 0.25 | 1.0                   | 1.5                             |
| 0.5  | 2.0                   | 3.5                             |
| 0.75 | 4.0                   | 8.0                             |
| 0.90 | 8.0                   | 16.0                            |
| 0.99 | 39.4                  | 81.7                            |
| 1.0  | 108.7                 | 434.0                           |

**Appendix 2.** Distribution of lorazepam milligram equivalent (LME)

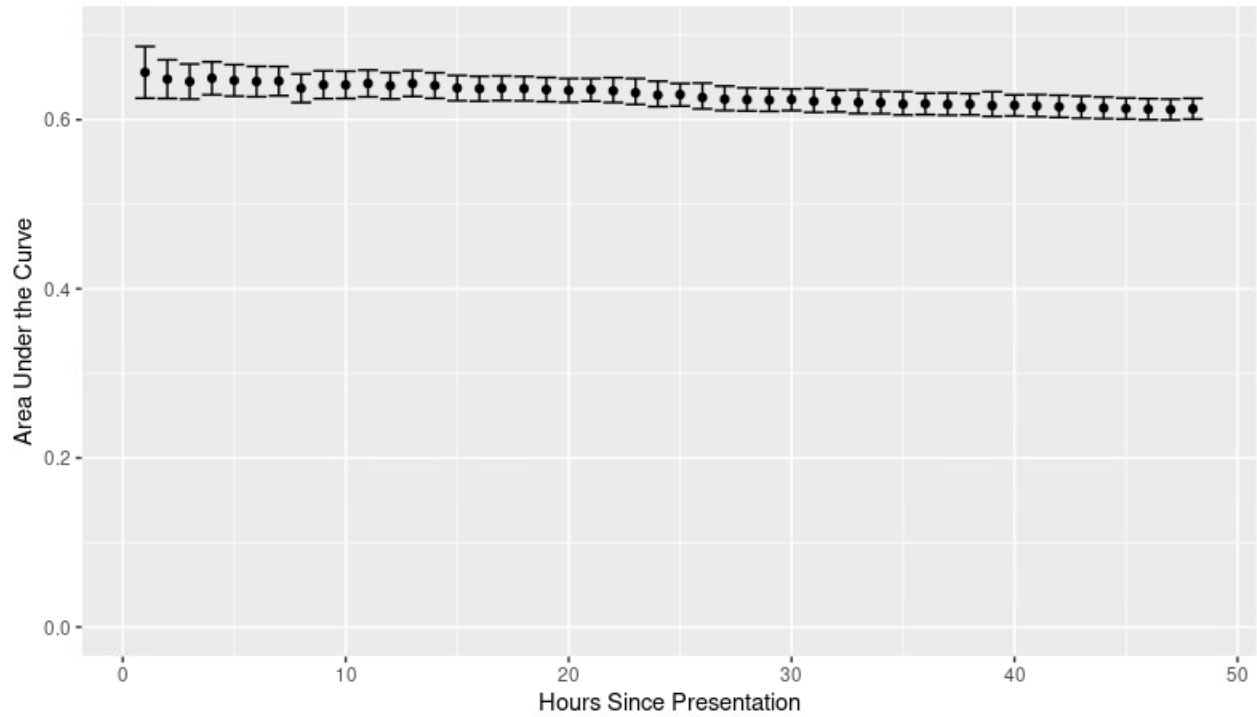

**Appendix 3.** Learning curve of a univariable logistic regression examining the total dose of Lorazepam milligram equivalent (LME) for every hour up to 48 hours and its association with the primary outcome

**Appendix 4.** Cohort patient characteristics by center

| Characteristic                                                                      | Total<br>(n=8,742) | University<br>of Chicago<br>(n=4147) | University<br>of<br>Wisconsin<br>(n=4595) | p                   |
|-------------------------------------------------------------------------------------|--------------------|--------------------------------------|-------------------------------------------|---------------------|
| Age, median (IQR)                                                                   | 51 [40, 59]        | 53 [41, 61]                          | 50 [39, 58]                               | <0.001              |
| Male, n (%)                                                                         | 5,854 (67.0)       | 2,701 (65.1)                         | 3,153 (68.6)                              | 0.001               |
| <b>Race, n (%)</b>                                                                  |                    |                                      |                                           | <0.001 <sup>a</sup> |
| American Indian or Alaska Native                                                    | 73 (0.8)           | 11 (0.3)                             | 62 (1.3)                                  |                     |
| Asian/Mideast Indian                                                                | 54 (0.6)           | 36 (0.9)                             | 18 (0.4)                                  |                     |
| Black/African American                                                              | 3,296 (37.7)       | 3,029 (73.0)                         | 267 (5.8)                                 |                     |
| Pacific Islander/Hawaiian Native                                                    | 18 (0.2)           | 5 (0.1)                              | 13 (0.3)                                  |                     |
| White/Caucasian                                                                     | 5,021 (57.4)       | 857 (20.7)                           | 4,164 (90.6)                              |                     |
| Other                                                                               | 280 (3.2)          | 209 (5.1)                            | 71 (1.5)                                  |                     |
| <b>Ethnicity, n (%)</b>                                                             |                    |                                      |                                           | <0.001 <sup>a</sup> |
| Declined/Unknown                                                                    | 124 (1.4)          | 65 (1.6)                             | 59 (1.3)                                  |                     |
| Hispanic/Latino                                                                     | 343 (3.9)          | 218 (5.3)                            | 125 (2.7)                                 |                     |
| Non-Hispanic/Latino                                                                 | 8,475 (94.7)       | 3,864 (93.2)                         | 4,411 (96.0)                              |                     |
| BAC <sup>b</sup> > 0                                                                | 2,896 (50.6)       | 978 (35.8)                           | 1918 (64.2)                               | <0.001              |
| Maximum CIWA-Ar <sup>c</sup> Score in the first 24 hours of admission, median (IQR) | 11 [5, 16]         | 8 [3, 13]                            | 13 [9, 18]                                | <0.001              |
| Total LME <sup>d</sup> in the first 24 hours of admission, median (IQR)             | 2.5 [1, 6]         | 2 [1, 4]                             | 3.5 [1.5, 8]                              | <0.001              |
| <b>Elixhauser Comorbidities, n (%)</b>                                              |                    |                                      |                                           |                     |
| Alcohol use disorder                                                                | 6,747 (77.2)       | 2,522 (60.8)                         | 4,225 (91.9)                              | <0.001              |
| Fluid and electrolyte disorders                                                     | 5,183 (59.3)       | 2,188 (52.8)                         | 2,995 (65.2)                              | <0.001              |
| Hypertension                                                                        | 4,423 (50.6)       | 1,805 (43.5)                         | 2,618 (57.0)                              | <0.001              |
| Depression                                                                          | 3,323 (38.0)       | 671 (16.2)                           | 2,652 (57.7)                              | <0.001              |
| Arrhythmia                                                                          | 3,297 (37.7)       | 1,119 (27.0)                         | 2,178 (47.4)                              | <0.001              |
| Liver disease                                                                       | 2,874 (32.9)       | 743 (17.9)                           | 2,131 (46.4)                              | <0.001              |
| Drug use disorder                                                                   | 2,529 (28.9)       | 746 (18.0)                           | 1,783 (38.8)                              | <0.001              |
| Chronic pulmonary disease                                                           | 2,518 (28.8)       | 1,039 (25.1)                         | 1,479 (32.2)                              | <0.001              |
| Neurological disorders                                                              | 2,418 (27.7)       | 1,013 (24.4)                         | 1,405 (30.6)                              | <0.001              |
| Coagulopathy                                                                        | 1,952 (22.3)       | 551 (13.3)                           | 1,401 (30.5)                              | <0.001              |

<sup>a</sup>p-values assessed the significance of the differences across all groups

<sup>b</sup>BAC: Blood alcohol content

<sup>c</sup>CIWA-Ar: Clinical Institute Withdrawal Assessment

<sup>d</sup>LME: Lorazepam milligram equivalent

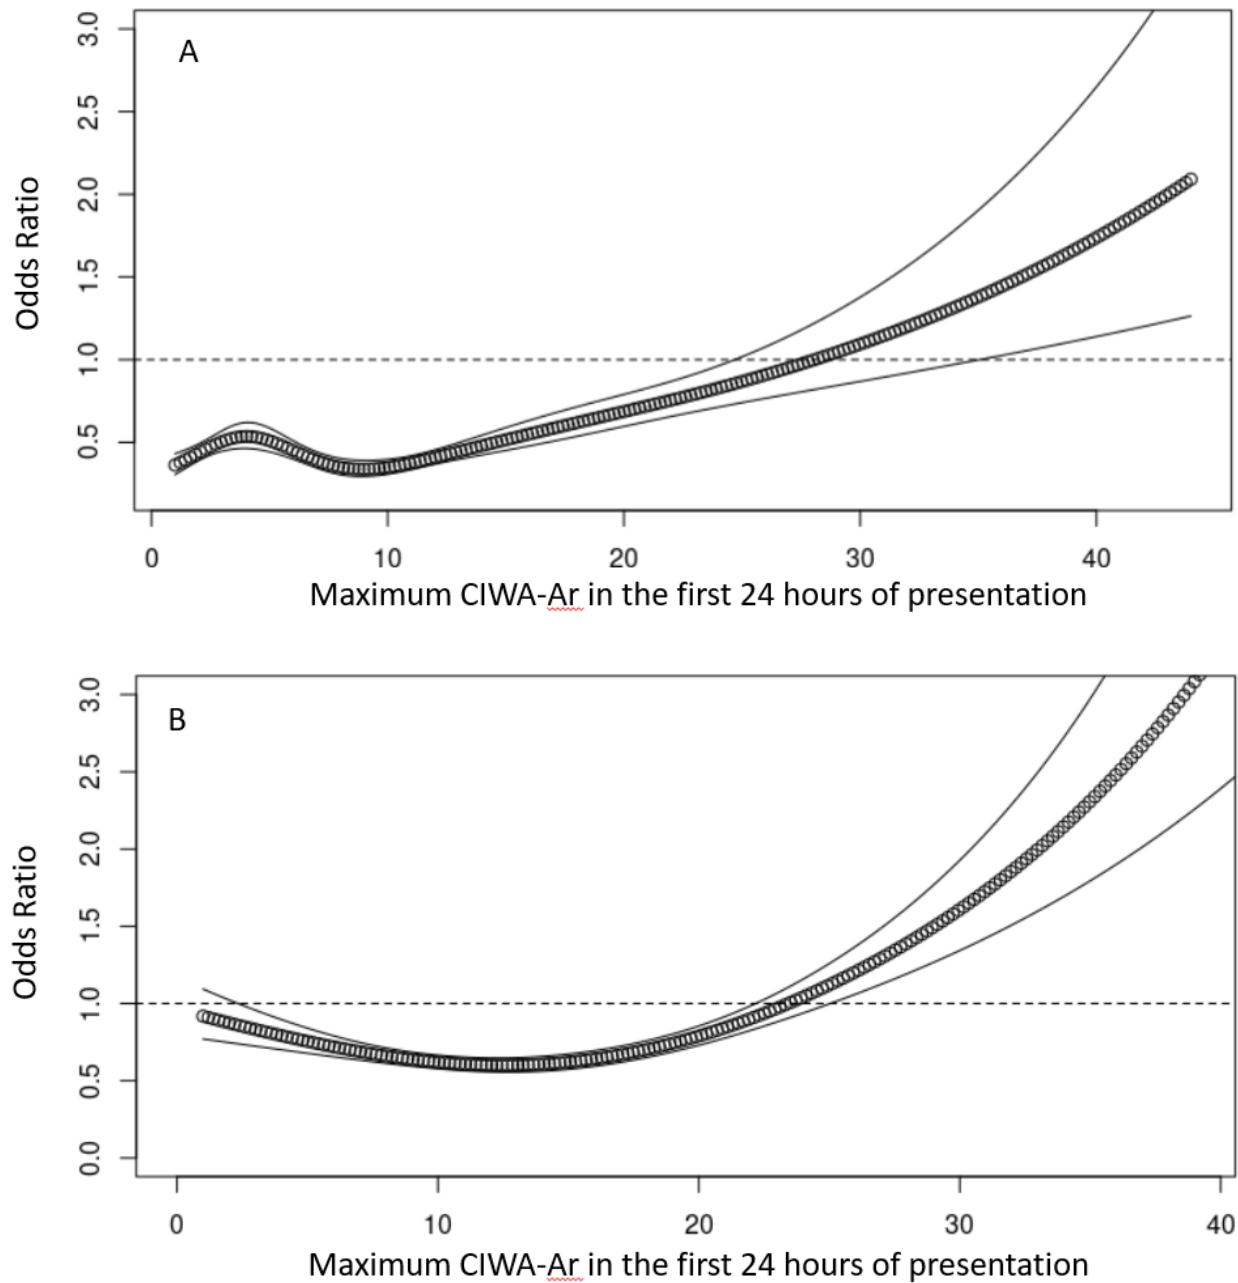

**Appendix 5.** Restricted cubic spline (RCS) regression of the odds ratio of the maximum Clinical Institute Withdrawal Assessment (CIWA-Ar) score in the first 24 hours of admission and Severe Alcohol Withdrawal Syndrome (SAWS) at (1) University of Chicago and (B) University of Wisconsin

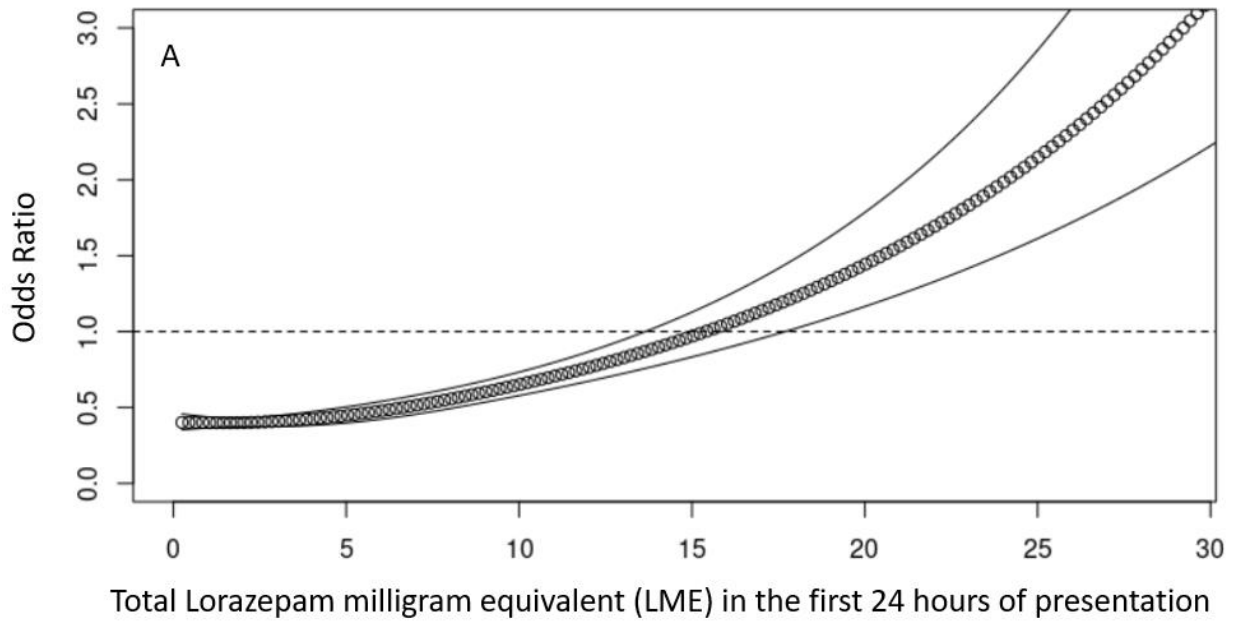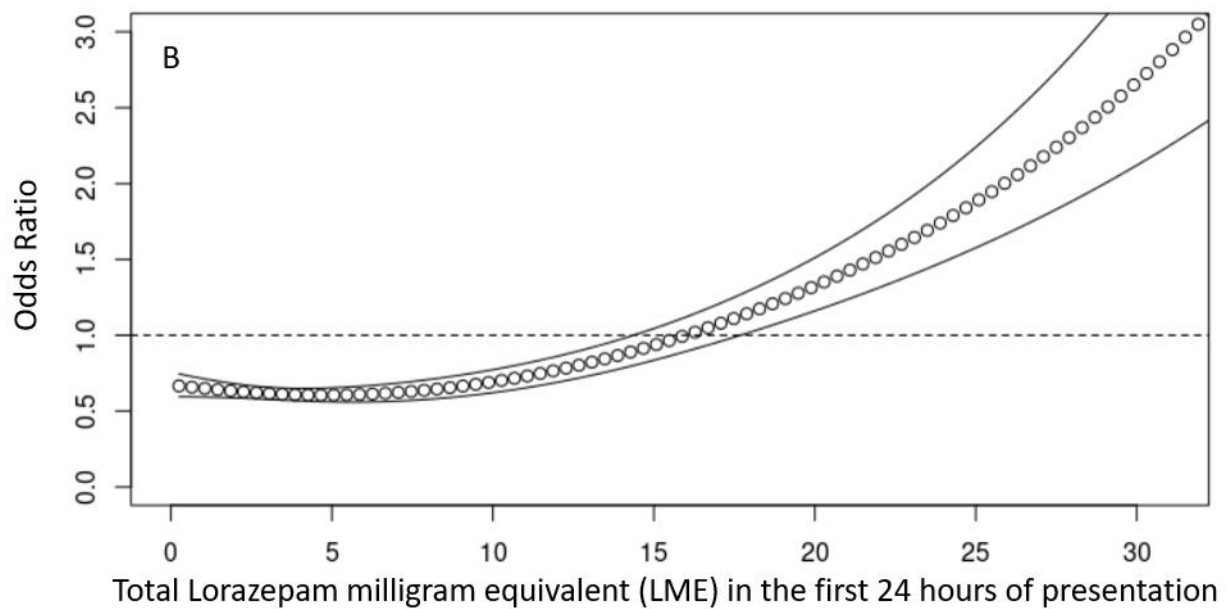

**Appendix 6.** Restricted cubic spline (RCS) regression of the odds ratio of the total Lorazepam milligram equivalent (LME) in the first 24 hours of admission and Severe Alcohol Withdrawal Syndrome (SAWS) at (1) University of Chicago and (B) University of Wisconsin
